# Supplementary material for: Growth Mechanism Studies of ZnO Nanowires: Experimental Observations and Short-Circuit Diffusion Analysis
Source: PubMed Central journal article supplement (PMC5535254; doi:10.3390/nano7070188), 2017-07-21
Supplement: nanomaterials-07-00188-s001.pdf [file nanomaterials-07-00188-s001.pdf]

Supplementary information

# Growth Mechanism Studies of Multi-Dimensional ZnO Nanowires: Experimental Observations and Theoretical Simulations

Po-Hsun Shih and Sheng Yun Wu\*

Department of Physics, National Dong Hwa University, Hualien 97401, Taiwan

**Table S1.** A list of space groups and lattice parameters of Zn, Ti and ZnO.

|     |                      | Hexagonal Structure |       |                                           |
|-----|----------------------|---------------------|-------|-------------------------------------------|
|     | Space group          | a(nm)               | c(nm) | Angles                                    |
| Zn  | P6 <sub>3</sub> /mmc | 0.267               | 0.494 | $\alpha=\beta=90^\circ, \gamma=120^\circ$ |
| Ti  | P6 <sub>3</sub> /mmc | 0.295               | 0.469 | $\alpha=\beta=90^\circ, \gamma=120^\circ$ |
| ZnO | P6 <sub>3</sub> mc   | 0.324               | 0.520 | $\alpha=\beta=90^\circ, \gamma=120^\circ$ |

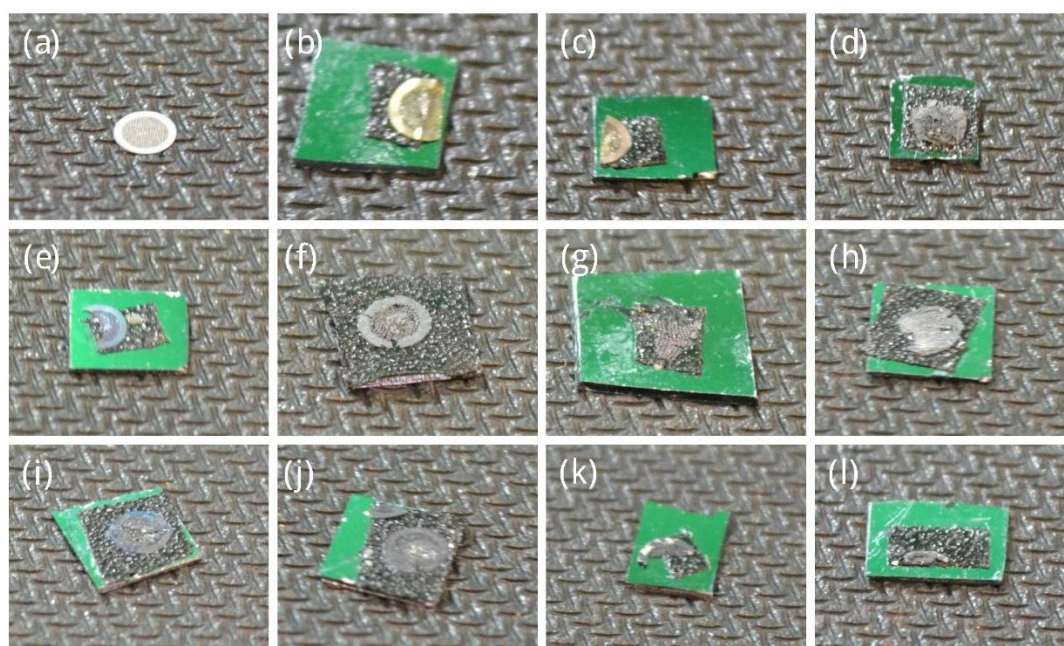

**Figure S1.** Optical images for various annealing temperature of samples (a) an unheated Ti grid and a series of samples synthesized at (b) 300 °C; (c) 350 °C; (d) 400 °C; (e) 450 °C; (f) 500 °C; (g) 550 °C; (h) 600 °C; (i) 650 °C; (j) 700 °C; (k) 750 °C; and (l) 800 °C, respectively.

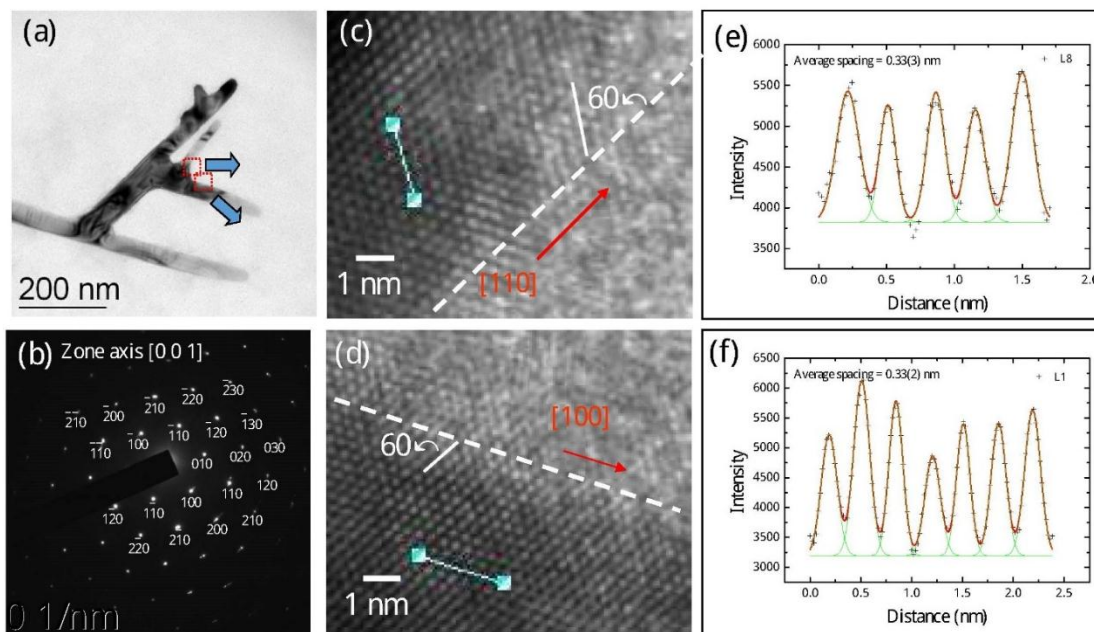

**Figure S2.** (a) TEM image; (b) corresponding selected-area electron pattern; (c–d) high-resolution images of selected regions (marked in (a)) of ZnO nanowires for T500; (e) and (f) show the height-position intensity along the lines taken from HR-TEM marked in (c) and (d), respectively.

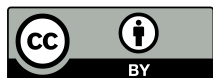

© 2017 by the authors. Submitted for possible open access publication under the terms and conditions of the Creative Commons Attribution (CC BY) license (<http://creativecommons.org/licenses/by/4.0/>).
